# Supplementary material for: Ganoderma lucidum Modulates Glucose, Lipid Peroxidation and Hepatic Metabolism in Streptozotocin-Induced Diabetic Pregnant Rats
Source: MDPI journal article supplement (doi:10.3390/antiox11061035), 2022-05-24

Supplementary Material

Supplementary Figure S1. Fingerprint composition of the *Ganoderma lucidum* (GI) mushroom methanolic extract by Chromatogram High Performance Liquid Chromatography. In (A) general chromatogram; (B) chromatogram with retention times.

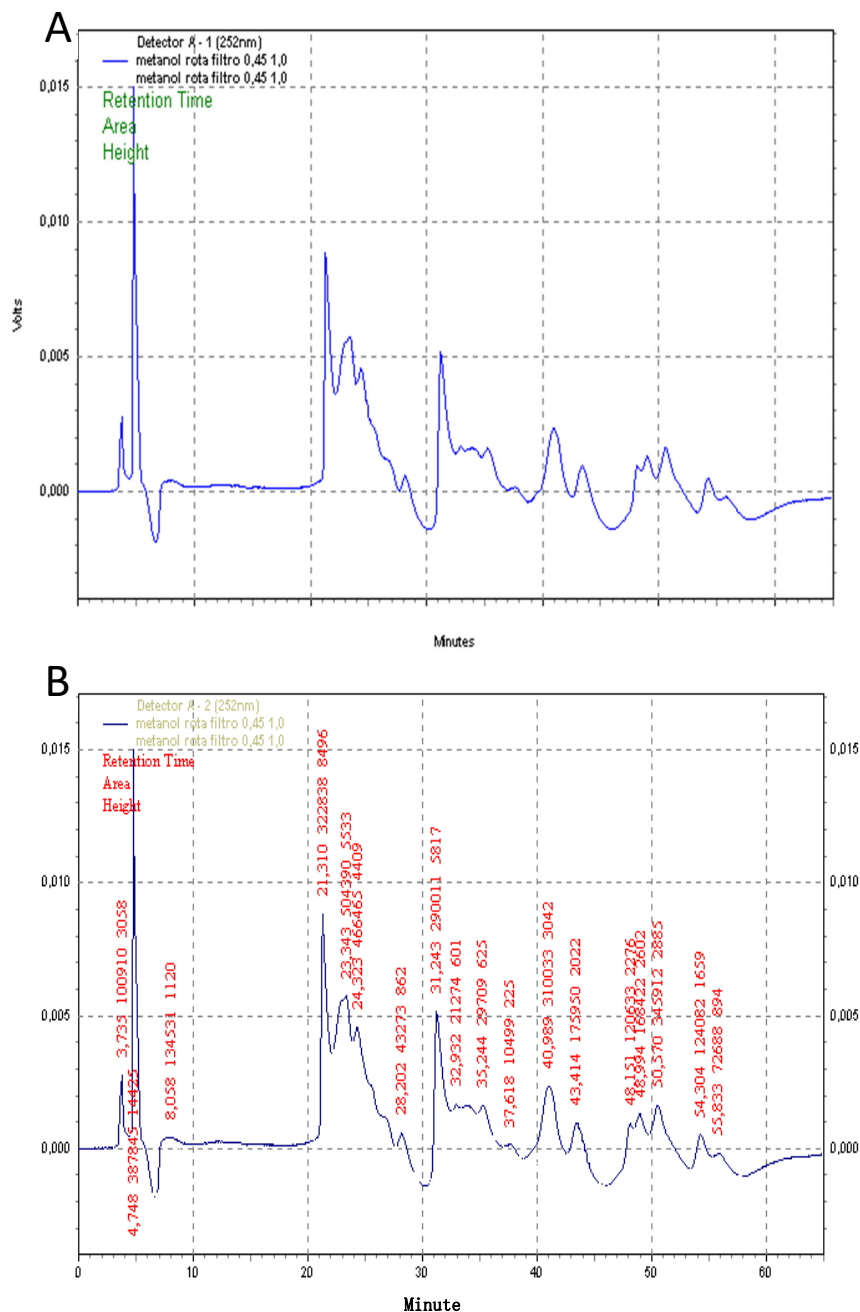

Supplementary Figure S2. Fingerprint composition of the *Ganoderma lucidum* (GI) mushroom chloroform extract by Chromatogram High Performance Liquid Chromatography. In (A) general chromatogram; (B) chromatogram with retention times.

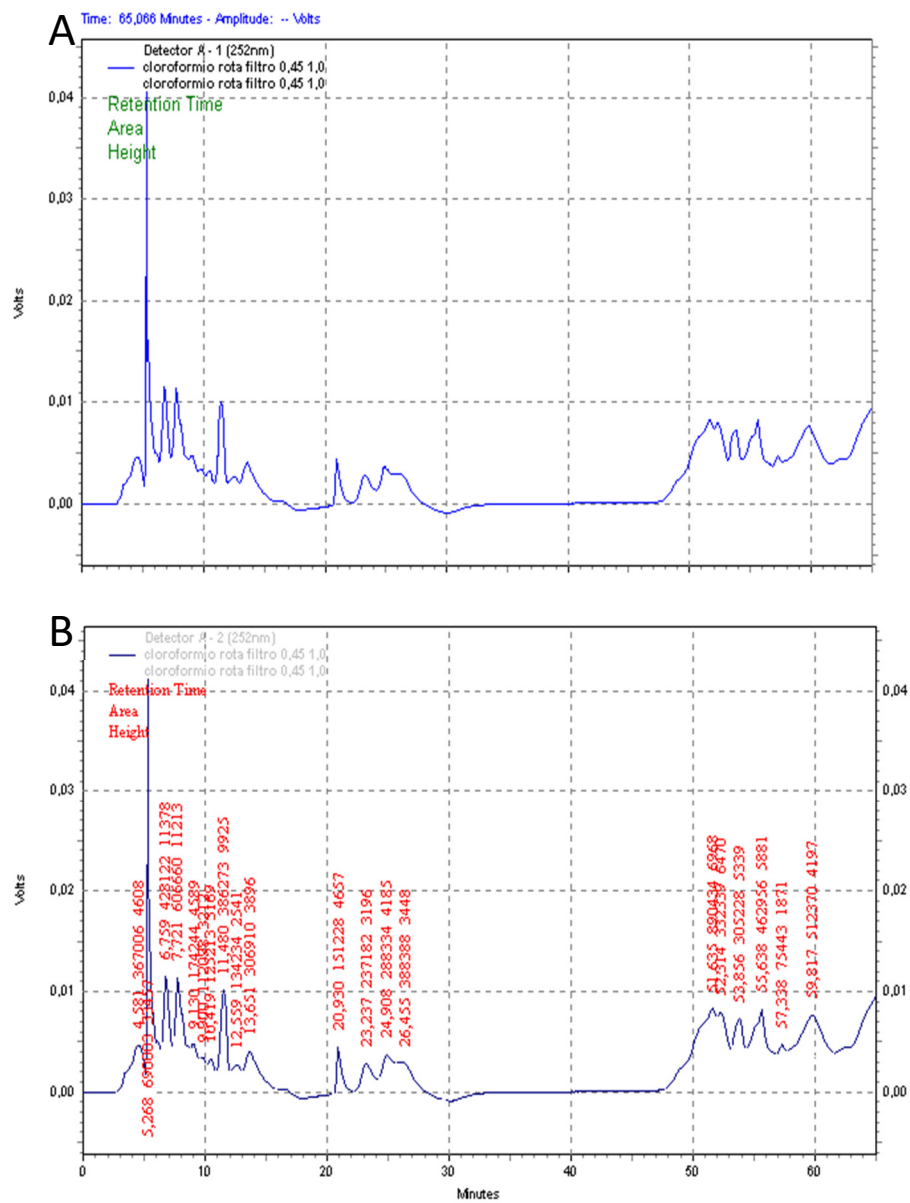

Supplement: s1 [file s1]
